# Supplementary material for: Comparative functional anatomy of hindlimb muscles and bones with reference to aquatic adaptation of the sea otter
Source: PubMed Central journal article supplement — J Vet Med Sci. 2015 Feb 9;77(5):571–8. doi: 10.1292/jvms.14-0534 (PMC4478071; doi:10.1292/jvms.14-0534), 2015-02-09
Supplement: jvms-77-571-s001.pdf [file jvms-77-571-s001.pdf]

**Supplementary Table 1.** List of specimens used in this study

| Species               | Specimen no.          | Sex             | Locality         | Country       | Methods             |   |
|-----------------------|-----------------------|-----------------|------------------|---------------|---------------------|---|
| <i>Enhydra lutris</i> | NSM37707              | F <sup>a)</sup> | U <sup>b)*</sup> | Japan         | B <sup>c)</sup>     |   |
|                       | ODA20080522-01        | M <sup>d)</sup> | U*               | Japan         | B, MM <sup>e)</sup> |   |
|                       | UMUT08392             | M               | U*               | Japan         | B, MM               |   |
|                       | UMUT12247             | F               | U*               | Japan         | MM                  |   |
|                       | UMUT13047             | M               | U*               | Japan         | MM                  |   |
|                       | USNM271748            | M               | Alaska           | United States | B                   |   |
|                       | USNM265075            | M               | Alaska           | United States | B                   |   |
|                       | USNM21336             | M               | Kamchatka        | Russia        | B                   |   |
|                       | USNM49459             | U               | Kamchatka        | Russia        | B                   |   |
|                       | USNM396641            | M               | U                | U             | B                   |   |
|                       | USNMA03642            | U               | Oregon           | United States | B                   |   |
|                       | USNM49492             | U               | U                | Russia        | B                   |   |
|                       | USNM13304             | U               | U                | U             | B                   |   |
|                       | USNM93954             | M               | Washington       | United States | B                   |   |
|                       | USNM271749            | U               | Alaska           | United States | B                   |   |
| <i>Lutra lutra</i>    | NSM16201              | F               | Kochi            | Japan         | B                   |   |
|                       | NSM33858              | M               | U                | U             | B                   |   |
|                       | NSM33859              | F               | U                | U             | B                   |   |
|                       | NSM19652              | U               | U                | U             | B                   |   |
|                       | NSM17237              | M               | Chiba            | Japan         | B                   |   |
|                       | AKOC10006             | M               | Gangwon          | Korea         | B, MM               |   |
|                       | AKOC10020             | M               | Busan            | Korea         | B, MM               |   |
|                       | AKOC10039             | M               | Ulsan            | Korea         | B, MM               |   |
|                       | AKOC10022             | F               | Hwacheon         | Korea         | B, MM               |   |
|                       | AKOC10001             | M               | U                | Korea         | B, MM               |   |
| <i>Neovison vison</i> | UMUT11026             | M               | Fukushima        | Japan         | MM                  |   |
|                       | UMUT11027             | M               | Fukushima        | Japan         | MM                  |   |
|                       | UMUT11028             | M               | Fukushima        | Japan         | MM                  |   |
|                       | UMUT11029             | F               | Fukushima        | Japan         | MM                  |   |
|                       | NSM39251              | F               | Hokkaido         | Japan         | MM                  |   |
|                       | HIR16                 | M               | Kagawa           | Japan         | B                   |   |
|                       | HIR18                 | M               | Kagawa           | Japan         | B                   |   |
|                       | HIR19                 | M               | Kagawa           | Japan         | B                   |   |
|                       | HIR20                 | M               | Kagawa           | Japan         | B                   |   |
|                       | HIR21                 | M               | Kagawa           | Japan         | B                   |   |
|                       | HIR22                 | M               | Kagawa           | Japan         | B                   |   |
|                       | HIR28                 | M               | Kagawa           | Japan         | B                   |   |
|                       | HIR29                 | M               | Kagawa           | Japan         | B                   |   |
|                       | HIR44                 | M               | Kagawa           | Japan         | B                   |   |
|                       | HIR45                 | M               | Kagawa           | Japan         | B                   |   |
|                       | <i>Mustela itatsi</i> | ABE93           | M                | Hyogo         | Japan               | B |
|                       |                       | ABE94           | M                | Hyogo         | Japan               | B |
| ABE95                 |                       | M               | Hyogo            | Japan         | B                   |   |
| ABE96                 |                       | M               | Hyogo            | Japan         | B                   |   |
| ABE97                 |                       | M               | Hyogo            | Japan         | B                   |   |
| ABE98                 |                       | M               | Hyogo            | Japan         | B                   |   |

(Continued)

(Continued)

| Species               | Specimen no.            | Sex    | Locality | Country | Methods |   |
|-----------------------|-------------------------|--------|----------|---------|---------|---|
| <i>Mustela itatsi</i> | ABE100                  | M      | Hyogo    | Japan   | B       |   |
|                       | ABE101                  | M      | Hyogo    | Japan   | B       |   |
|                       | ABE102                  | M      | Hyogo    | Japan   | B       |   |
|                       | ABE129                  | M      | Hyogo    | Japan   | B       |   |
|                       | ABE131                  | M      | Hyogo    | Japan   | B       |   |
|                       | ABE132                  | M      | Hyogo    | Japan   | B       |   |
|                       | ABE133                  | M      | Hyogo    | Japan   | B       |   |
|                       | ABE134                  | M      | Hyogo    | Japan   | B       |   |
|                       | ABE135                  | M      | Hyogo    | Japan   | B       |   |
|                       | ABE136                  | M      | Hyogo    | Japan   | B       |   |
|                       | ABE138                  | M      | Hyogo    | Japan   | B       |   |
|                       | ABE139                  | M      | Hyogo    | Japan   | B       |   |
|                       | ABE141                  | M      | Hyogo    | Japan   | B       |   |
|                       | ABE142                  | M      | Hyogo    | Japan   | B       |   |
|                       | ABE143                  | M      | Hyogo    | Japan   | B       |   |
|                       | ABE144                  | M      | Hyogo    | Japan   | B       |   |
|                       | ABE145                  | M      | Hyogo    | Japan   | B       |   |
|                       | ABE146                  | M      | Hyogo    | Japan   | B       |   |
|                       | KPM-NF1004897           | M      | Kanagawa | Japan   | B, MM   |   |
|                       | KPM-NF1004898           | M      | Kanagawa | Japan   | B, MM   |   |
|                       | SS1001                  | M      | Shizuoka | Japan   | MM      |   |
|                       | SS1002                  | M      | Shizuoka | Japan   | MM      |   |
|                       | UMUT13044               | M      | Tokyo    | Japan   | MM      |   |
|                       | UMUT13045               | M      | Saitama  | Japan   | MM      |   |
|                       | UMUT13046               | M      | Gifu     | Japan   | MM      |   |
|                       | <i>Mustela sibirica</i> | ABE35  | M        | Hyogo   | Japan   | B |
|                       |                         | ABE42  | M        | Hyogo   | Japan   | B |
|                       |                         | ABE117 | M        | Hyogo   | Japan   | B |
|                       |                         | ABE137 | M        | Hyogo   | Japan   | B |
|                       |                         | ABE140 | M        | Hyogo   | Japan   | B |
| ABE151                |                         | M      | Hyogo    | Japan   | B       |   |
| ABE153                |                         | M      | Hyogo    | Japan   | B       |   |
| ABE173                |                         | M      | Hyogo    | Japan   | B       |   |
| ABE189                |                         | M      | Hyogo    | Japan   | B       |   |
| ABE212                |                         | M      | Hyogo    | Japan   | B       |   |
| ABE213                |                         | M      | Hyogo    | Japan   | B       |   |
| ABE224                |                         | M      | Hyogo    | Japan   | B       |   |
| ABE228                |                         | M      | Hyogo    | Japan   | B       |   |
| ABE285                |                         | M      | Hyogo    | Japan   | B       |   |
| ABE287                |                         | M      | Hyogo    | Japan   | B       |   |
| ABE288                |                         | M      | Hyogo    | Japan   | B       |   |
| ABE294                |                         | M      | Hyogo    | Japan   | B       |   |
| ABE591                |                         | M      | Hyogo    | Japan   | B       |   |
| ABE600                |                         | M      | Hyogo    | Japan   | B       |   |
| ABE662                |                         | M      | Hyogo    | Japan   | B       |   |
| ABE663                |                         | M      | Hyogo    | Japan   | B       |   |
| ABE713                |                         | M      | Hyogo    | Japan   | B       |   |

(Continued)

(Continued)

| Species                 | Specimen no. | Sex | Locality | Country | Methods |
|-------------------------|--------------|-----|----------|---------|---------|
| <i>Mustela sibirica</i> | ABE737       | M   | Hyogo    | Japan   | B       |
|                         | SS5          | M   | Kyoto    | Japan   | MM      |
|                         | SS15         | M   | Kyoto    | Japan   | MM      |
|                         | SS22         | M   | Kyoto    | Japan   | MM      |
|                         | SS27         | M   | Kyoto    | Japan   | MM      |
|                         | SS1003       | M   | Kyoto    | Japan   | MM      |

a) F, female. b) U, unknown. Asterisks indicate the specimens came from aquariums. c) B, bone measurement. d) M, male. e) MM, muscle mass. The prefix abbreviations of specimen numbers mean the following: ABE, Private collection belonging to Mikiko Abe; AKOC, Association of Korean Otter Conservation; HIR, Private collection belonging to Satoshi Kawaguchi; KPM, Kanagawa Prefectural Museum of Natural History; NSM, National Museum of Nature and Science, Tokyo; ODA, Private collection belonging to Sen-ichi Oda; SS, Private collection belonging to Satoshi Suzuki; UMUT, The University Museum, The University of Tokyo; USNM, Smithsonian Institution National Museum of Natural History.

**Supplementary Table 2.** Nomenclature of hind limb muscles in this and previous studies

| Fisher, 1942 ( <i>Lontra canadensis</i> ) [14] | Howard, 1975 ( <i>Enhydra lutris</i> ) [16] | Klingener, 1979 ( <i>Neovison vison</i> ) [21]  | Evans, 1993 ( <i>Canis lupus</i> ) [9] | This study                    |
|------------------------------------------------|---------------------------------------------|-------------------------------------------------|----------------------------------------|-------------------------------|
| Gluteus maximus                                | Gluteus maximus                             | Gluteus maximus                                 | Gluteus superficialis                  | Gluteus superficialis         |
| Gluteus medius                                 | Gluteus medius                              | Gluteus medius                                  | Gluteus medius                         | Gluteus medius                |
| Gluteus minimus                                | Gluteus minimus                             | Gluteus minimus                                 | Gluteus profundus                      | Gluteus profundus             |
| Piriformis                                     | Piriformis                                  | ----                                            | Piriformis                             | Piriformis                    |
| Gemellus superior                              | (Iliocapsularis)                            | ----                                            | Gluteus profundus                      | Iliocapsularis                |
| Gemellus medius                                | Gemelli                                     | Gemellus superior                               | Gemelli                                | Gemelli                       |
| Gemellus inferior                              | Gemelli                                     | Gemellus inferior                               | Gemelli                                | Gemelli                       |
| Quadratus femoris                              | Iliocapsularis (quadratus femoris)          | Quadratus femoris                               | Quadratus femoris                      | Quadratus femoris             |
| Obturator externus                             | Obturator externus                          | Obturator externus                              | Obturator externus                     | Obturator externus            |
| Obturator internus                             | Obturator internus                          | Obturator internus                              | Obturator internus                     | Obturator internus            |
| Iliopsoas                                      | Iliopsoas                                   | Iliopsoas                                       | Iliopsoas                              | Iliopsoas                     |
| Tensor fasciae latae                           | ----                                        | Tensor fasciae latae                            | Tensor fasciae latae                   | Tensor fasciae latae          |
| Biceps femoris                                 | Biceps femoris                              | Biceps femoris                                  | Biceps femoris                         | Biceps femoris                |
| Tenuissimus                                    | Tenuissimus                                 | Tenuissimus                                     | Abductor cruris caudalis (tenuissimus) | Tenuissimus                   |
| Caudofemoralis                                 | Caudofemoralis                              | Femorococcygeus (Caudofemoralis)                | ----                                   | Gluteofemoralis               |
| Semitendinosus                                 | Semitendinosus                              | Semitendinosus                                  | Semitendinosus                         | Semitendinosus                |
| Semimembranosus                                | Semimembranosus                             | Semimembranosus                                 | Semimembranosus cranial head           | Semimembranosus cranialis     |
| ----                                           | ----                                        | Presemimembranosus                              | Semimembranosus caudal head            | Semimembranosus caudalis      |
| Presemimembranosus                             | Presemimembranosus                          | ----                                            | ----                                   | Presemimembranosus            |
| Sartorius                                      | Sartorius                                   | Sartorius                                       | Sartorius                              | Sartorius                     |
| Gracilis                                       | Gracilis                                    | Gracilis                                        | Gracilis                               | Gracilis                      |
| Adductor femoris                               | Adductor femoris                            | Adductor magnus                                 | Adductor magnus et brevis              | Adductor                      |
| Adductor longus                                | Adductor longus                             | Adductor longus                                 | Adductor longus                        | Adductor                      |
| Pectineus                                      | Pectineus                                   | ----                                            | Pectineus                              | Pectineus                     |
| Rectus femoris                                 | Rectus femoris                              | Rectus femoris                                  | Rectus femoris                         | Rectus femoris                |
| Vastus lateralis                               | Vastus lateralis                            | Vastus lateralis                                | Vastus lateralis                       | Vastus lateralis              |
| Vastus medialis                                | Vastus medialis                             | Vastus medialis                                 | Vastus medialis                        | Vastus medialis               |
| ----                                           | ----                                        | Vastus intermedius                              | Vastus intermedius                     | Vastus intermedius            |
| Gastrocnemius                                  | Gastrocnemius                               | Medial head, gastrocnemius                      | Medial head, gastrocnemius             | Gastrocnemius caput medialis  |
| ----                                           | ----                                        | Lateral head, gastrocnemius                     | Lateral head, gastrocnemius            | Gastrocnemius caput lateralis |
| Plantaris                                      | Plantaris                                   | Flexor digitorum superficialis                  | Flexor digitorum superficialis         | Plantaris                     |
| Soleus                                         | ----                                        | ----                                            | ----                                   | Soleus                        |
| Popliteus                                      | Popliteus                                   | Popliteus                                       | Popliteus                              | Popliteus                     |
| Flexor longus digitorum                        | Flexor digitorum longus                     | Flexor digitorum longus                         | Flexor digitorum longus                | Flexor digitorum longus       |
| Flexor longus hallucis                         | Flexor hallucis longus                      | Flexor hallucis longus                          | Flexor hallucis longus                 | Flexor hallucis longus        |
| Tibialis posterior                             | Tibialis posterior                          | Tibialis caudalis (Tibialis posterior)          | Tibialis caudalis                      | Tibialis caudalis             |
| Peroneus longus                                | Peroneus longus                             | Fibularis longus (Peroneus longus)              | Peroneus longus                        | Peroneus longus               |
| Peroneus digiti quinti                         | Peroneus digiti quinti                      | Extensor digitorum lateralis (Peroneus tertius) | Extensor digitorum lateralis           | Peroneus digiti quinti        |
| Peroneus brevis                                | Peroneus brevis                             | Fibularis brevis                                | Peroneus brevis                        | Peroneus brevis               |
| Extensor longus digitorum                      | Extensor digitorum longus                   | Extensor digitorum longus                       | Extensor digitorum longus              | Extensor digitorum longus     |
| Tibialis anterior                              | Tibialis anterior                           | Tibialis cranialis (Tibialis anterior)          | Tibialis cranialis                     | Tibialis cranialis            |
| Extensor brevis digitorum                      | Extensor digitorum brevis                   | ----                                            | Extensor digitorum brevis              | Extensor digitorum brevis     |
| Flexor brevis digitorum                        | Flexor digitorum brevis                     | ----                                            | Interflexorii                          | Flexor digitorum brevis       |
| Quadratus plantae                              | Quadratus plantae                           | ----                                            | Quadratus plantae                      | Quadratus plantae             |
| Lumbricales                                    | Lumbricales                                 | ----                                            | Lumbricales                            | Lumbricales                   |
| Abductor medius digiti quinti                  | ----                                        | ----                                            | Interosseus                            | Interosseus                   |
| Adductor medius digiti quinti                  | ----                                        | ----                                            | Adductor digiti quinti                 | Interosseus                   |
| Opponens digiti quinti                         | Opponens digiti quinti                      | ----                                            | Adductor digiti quinti                 | Interosseus                   |
| Calcaneometatarsalis                           | Calcaneometatarsalis                        | ----                                            | ----                                   | Calcaneometatarsalis          |
| Adductor brevis hallucis                       | ----                                        | ----                                            | ----                                   | Interosseus                   |
| Abductor medius hallucis                       | ----                                        | ----                                            | ----                                   | Interosseus                   |
| Extensor hallucis proprius                     | Extensor hallucis proprius (longus)         | Extensor hallucis longus                        | Extensor hallucis longus               | Extensor hallucis longus      |
| Abductor medius digiti secundi                 | ----                                        | ----                                            | Abductor medius digiti secundi         | Interosseus                   |
| Interosseus                                    | Interosseus                                 | ----                                            | Interosseus                            | Interosseus                   |
